# Supplementary material for: Enzyme immobilization on metal oxide semiconductors exploiting amine functionalized layer
Source: Royal Society of Chemistry journal article supplement (doi:10.1039/c7ra01615h), 2017-01-01
Supplement: c7ra01615h1.pdf [file c7ra01615h1.pdf]

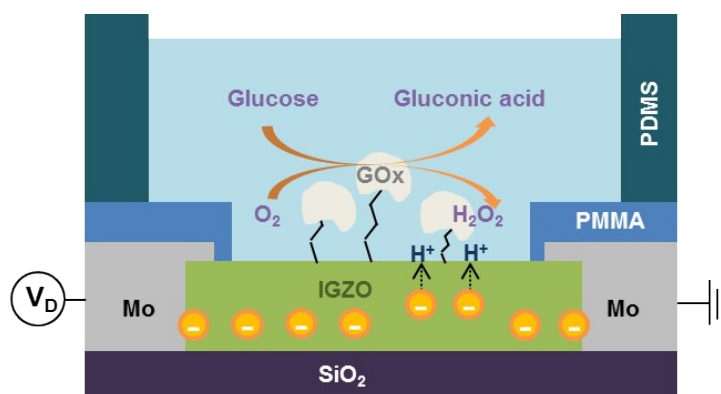

Fig. 1S. The schematics of the proposed sensor and its reaction with glucose.

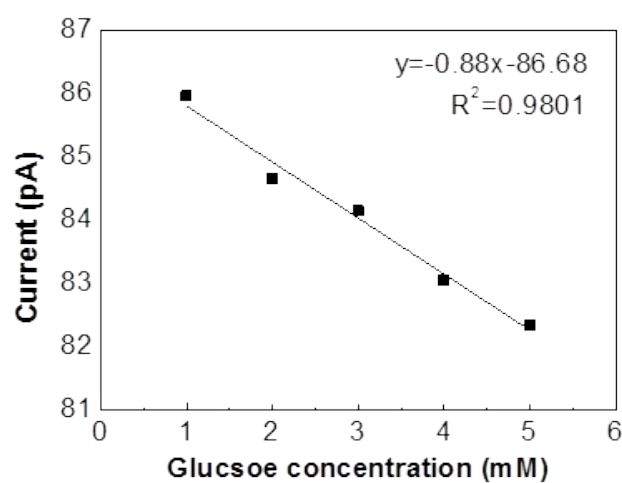

Fig. 2S. The linear response of the 5% APTES device with the addition of 1mM glucose. The measurement is conducted after 200 s of the base current stabilization time.
